# Supplementary material
Source: publisher figshare collection journal article supplement (https://karger.figshare.com/ndownloader/files/28541220)
Supplement: Supplementary file 1 [file 28541220]

**Rapid Serological Tests for Sars-Cov-2: Diagnostic Performance of Four Commercial Assays**

aSérgio M. de Almeida, aRegiane N. Spalanzani, aMeri B. Nogueira, aBeatriz Sanada, aBarbara M Cavalli, aIndianara Rotta,aGislene R. A. Takahashi,aLuciane A. Pereira,aFrancielli B. Moreira,aCarolina L.T. Dino,bMaria E. Graf, bBernardo M.M. deAlmeida,bNatalia R. Domino,aGustavo Genelhoud,aLucas B. Bueno, bSonia M. Raboni

aVirology Laboratory, Universidade Federal do Paraná, Curitiba, Brazil, bInfectious Diseases Division, Universidade Federal do Paraná, Curitiba, Brazil

**Address all correspondence to:**

Sonia M Raboni

R General Carneiro, 180, Curitiba

Zip Code: 80060-900

Brazil

E-mail: [sraboni@ufpr.br](mailto:sraboni@ufpr.br)

**Short title:** LFA for SARS-COV-2 Diagnosis

**Key-words:** SARS-CoV-2 **·** Serology **·** Rapid test **·** Lateral flow immunochromatographic assay

**Supplementary Table 1.** Chest computed tomography and epidemiological characteristics of the participants included in the group SARS-CoV-2 RT-q PCR negative performed by the HC-UFPR virology laboratory (probable SARS-CoV-2 infection)

| Case | Ground Glass Opacitya | Contact with infected person | Hospital unit admitted | Serum hs-CRPb  mg/L |
| --- | --- | --- | --- | --- |
| 1 | Yes | No | - | 7.09 |
| 2 | Yes | Not informed | COVID | 9.40 |
| 3 | Yes | Not informed | Intensive care | - |
| 4 | Yes | Not informed | COVID | >16.00 |
| 5 | Yes | No | COVID | 5.72 |
| 6 | Yes | No | Infectious disease | 5.00 |
| 7 | Yes | No | COVID | 12.26 |
| 8 | No | Not informed | - | 3.21 |
| 9 | No | Not informed | COVID | - |
| 10 | Yes | Not informed | - | 8.26 |
| 11 | No | Yes | - | >16.00 |
| 12 | No | Not informed | - | 4.08 |

aChest computed tomography; bhigh-sensitivity C-reactive protein (hs-CRP)

**Supplementary Table 2.** Cohen’s *Kappa* coefficients and tests agreement for IgM, IgG and Total antibodies

|  | *Kappa* (95% CI) | Agreement | *p* |
| --- | --- | --- | --- |
|  |  |  |  |
| MedTest vs. Wondfo | 0.97 (0.92; 1.01) | Perfect | 0.500 |
| EcoTest vs. MedTest | 0.75 (0.63; 0.88) | Good | 0.180 |
| Camtech vs MedTest | 0.73 (0.60; 0.86) | Good | 0.0001 |
| Wonfo vs. EcoTest | 0.75 (0.63; 0.87) | Good | 0.424 |
| Camtech vs EcoTest | 0.61 (0.45; 0.76) | Good | 0.078 |
| Wonfo vs. Camtech | 0.78 (0.66; 0.90) | Good | 0.0005 |
